# Supplementary material for: Colocalization of expression transcripts with COVID-19 outcomes is rare across cell states, cell types and organs
Source: PubMed Central journal article supplement (PMC10511363; doi:10.1007/s00439-023-02590-w), 2023-08-28
Supplement: 439_2023_2590_MOESM1_ESM.pdf [file 439_2023_2590_MOESM1_ESM.pdf]

**Supplemental Table 2.**

| Gene                | Colocalizing cell/tissue                                                                                                                                                                                                                                                                                                                                                                                                                                        | Existing evidence                                                                                                                                                                                          |
|---------------------|-----------------------------------------------------------------------------------------------------------------------------------------------------------------------------------------------------------------------------------------------------------------------------------------------------------------------------------------------------------------------------------------------------------------------------------------------------------------|------------------------------------------------------------------------------------------------------------------------------------------------------------------------------------------------------------|
| <i>ABO</i>          | Adrenal gland (Severe) - Hazardous<br>Artery tibial (Severe) – Hazardous<br>Breast Mammary Tissue (Susceptible) – Hazardous<br>Esophagus mucosa (Susceptible) - Hazardous<br>Esophagus muscularis (Severe) - Hazardous<br>Heart Left Ventricle (Severe and Hospitalized) – Hazardous<br>Liver (Hospitalized) - Hazardous<br>Muscle skeletal (Severe) - Hazardous<br>Testis (All) - Hazardous<br>Whole blood COVID+ Symptoms+ (Hospitalized) - <b>Protective</b> | MR in non-GTEX and GTEX eQTL and pQTL datasets for lung and whole blood (Baranova et al. 2022; Hernandez Cordero et al. 2021)                                                                              |
| <i>ADAM15</i>       | T central memory Stim 5d (Susceptible) - Hazardous                                                                                                                                                                                                                                                                                                                                                                                                              | MR with colocalization in GTEX did not observe colocalization (Wang et al. 2022)                                                                                                                           |
| <i>ATP11A</i>       | Artery Aorta (Hospitalized) - Protective                                                                                                                                                                                                                                                                                                                                                                                                                        | Fine mapping (Kousathanas et al. 2022)                                                                                                                                                                     |
| <i>ATP5PO</i>       | Lung (Hospitalized) - Hazardous                                                                                                                                                                                                                                                                                                                                                                                                                                 | Associational (Li et al. 2022)                                                                                                                                                                             |
| <i>CNPY4</i>        | Testis (Severe) - Protective                                                                                                                                                                                                                                                                                                                                                                                                                                    | None                                                                                                                                                                                                       |
| <i>COPS6</i>        | Esophagus muscularis (Hospitalized) - Protective                                                                                                                                                                                                                                                                                                                                                                                                                | None                                                                                                                                                                                                       |
| <i>DLX3</i>         | Lung (Hospitalized) - Hazardous                                                                                                                                                                                                                                                                                                                                                                                                                                 | MR with colocalization in lung (Hernandez Cordero et al. 2021)                                                                                                                                             |
| <i>DPP9</i>         | Skin sun exposed lower leg (All) - Protective                                                                                                                                                                                                                                                                                                                                                                                                                   | Associational data in blood (Sharif-Zak et al. 2022)                                                                                                                                                       |
| <i>FAM55C</i>       | Esophagus muscularis (Susceptible) - Hazardous                                                                                                                                                                                                                                                                                                                                                                                                                  | None                                                                                                                                                                                                       |
| <i>GBA</i>          | Nerve Tibial (Susceptible) - Hazardous<br>Thyroid (Susceptible) - Hazardous                                                                                                                                                                                                                                                                                                                                                                                     | None                                                                                                                                                                                                       |
| <i>GBAP1</i>        | Breast Mammary Tissue (Susceptible) - Hazardous<br>Cultured Fibroblasts (Susceptible) - Hazardous<br>Colon Sigmoid (Susceptible) - Hazardous<br>Lung (Susceptible) - Hazardous<br>Nerve Tibial (Susceptible) - Hazardous<br>Small Intestine Terminal Ileum (Susceptible) - Hazardous<br>Stomach (Susceptible) - Hazardous                                                                                                                                       | MR with colocalization for splice isoform (Nakanishi et al. 2022)                                                                                                                                          |
| <i>HIP1</i>         | Breast mammary tissue (Severe) - Hazardous<br>Nerve tibial (Severe) - Hazardous<br>Whole blood COVID- Symptoms- (Severe) - <b>Protective</b>                                                                                                                                                                                                                                                                                                                    | None                                                                                                                                                                                                       |
| <i>IFNAR2</i>       | Cells cultured fibroblasts (Severe and hospitalized) - Protective<br>Esophagus mucosa (Susceptible) - Protective<br>Whole blood COVID- Symptoms+ (Hospitalized) - Protective<br>Whole blood COVID+ Symptoms+ (Severe) - Protective                                                                                                                                                                                                                              | MR with colocalization for GTEX v.7 eQTLs and pQTLs for whole-blood and lung (Baranova et al. 2021; Fricke-Galindo et al. 2022; Krishnamoorthy et al. 2023; Liu et al. 2021; Pairo-Castineira et al. 2021) |
| <i>IL10RB</i>       | Cells Cultured fibroblasts (All) - <b>Protective</b><br>Esophagus Gastroesophageal junction (All) - Hazardous<br>Skeletal muscle (Susceptible) - Hazardous<br>Nerve tibial (All) - Hazardous                                                                                                                                                                                                                                                                    | MR with colocalization for eQTLs and pQTLs, did not study excitatory neurons (Gaziano et al. 2021)                                                                                                         |
| <i>KCNC3</i>        | Tibial nerve (Severe and Hospitalized) – Hazardous                                                                                                                                                                                                                                                                                                                                                                                                              | TWAS (Krishnamoorthy et al. 2023)                                                                                                                                                                          |
| <i>LINC01301</i>    | Breast mammary tissue (Hospitalized) – Protective<br>Skin not sun exposed (Hospitalized) - Protective                                                                                                                                                                                                                                                                                                                                                           | TWAS (Pairo-Castineira et al. 2022)                                                                                                                                                                        |
| <i>LINC02210</i>    | Artery tibial (Severe) – Protective                                                                                                                                                                                                                                                                                                                                                                                                                             | MR with colocalization (Baranova et al. 2021)                                                                                                                                                              |
| <i>Lnc-INTS12-1</i> | Artery aorta (Severe) – Protective<br>Thyroid (Severe) - Protective                                                                                                                                                                                                                                                                                                                                                                                             | None                                                                                                                                                                                                       |
| <i>Lnc-THBS3-1</i>  | Whole blood COVID- Symptoms- (Susceptible) - Protective                                                                                                                                                                                                                                                                                                                                                                                                         | None                                                                                                                                                                                                       |
| <i>MAMSTR</i>       | Skin Sun Exposed (Hospitalized) – Protective                                                                                                                                                                                                                                                                                                                                                                                                                    | TWAS (Krishnamoorthy et al. 2023)                                                                                                                                                                          |

|                 |                                                                                                                                                                                                                                                                                                                                                                                                                                                                                                                                                                       |                                                                                           |
|-----------------|-----------------------------------------------------------------------------------------------------------------------------------------------------------------------------------------------------------------------------------------------------------------------------------------------------------------------------------------------------------------------------------------------------------------------------------------------------------------------------------------------------------------------------------------------------------------------|-------------------------------------------------------------------------------------------|
| <i>MUC1</i>     | Nerve tibial (Severe and Hospitalized) - Hazardous                                                                                                                                                                                                                                                                                                                                                                                                                                                                                                                    | MR from GTEx v.7 against HGI release 6 found signal in blood (Krishnamoorthy et al. 2023) |
| <i>MUC5B</i>    | Lung (Severe) - Protective                                                                                                                                                                                                                                                                                                                                                                                                                                                                                                                                            | MR only for lung eQTLs GTEx release 7 (Liu et al. 2021)                                   |
| <i>NAPSA</i>    | CD4 Naïve Stim 40h (Susceptible) - Hazardous<br>Esophageal mucosa (Severe and Hospitalized) - <b>Protective</b><br>T effector memory Stim 40h (All) - Hazardous<br>T naïve (Hospitalized and Susceptible) - Hazardous<br>Testis (Hospitalized) - <b>Protective</b>                                                                                                                                                                                                                                                                                                    | MR with colocalization for eQTLs, did not study CD4+ T cells (Degenhardt et al. 2022)     |
| <i>NAPSB</i>    | Artery Coronary (Susceptible) - Protective                                                                                                                                                                                                                                                                                                                                                                                                                                                                                                                            | None                                                                                      |
| <i>NTN5</i>     | Colon sigmoid (Hospitalized) - Protective<br>Esophageal Gastroesophageal junction (Hospitalized) - Protective<br>Esophagus mucosa (Severe and Hospitalized) - Protective                                                                                                                                                                                                                                                                                                                                                                                              | None                                                                                      |
| <i>OAS1</i>     | Adipose subcutaneous (Hospitalized) - Protective<br>Artery tibial (Susceptible) - Protective<br>Esophagus mucosa (Hospitalized) - <b>Hazardous</b><br>Nerve tibial (Susceptible) - <b>Hazardous</b><br>Skin not sun exposed (Severe and Susceptible) - Protective<br>Skin sun exposed (All) - Protective                                                                                                                                                                                                                                                              | MR with colocalization of eQTL and pQTL (Zhou et al. 2021)                                |
| <i>PDCL3P4</i>  | Brain Caudate Basal Ganglia (Susceptible)                                                                                                                                                                                                                                                                                                                                                                                                                                                                                                                             | Colocalization (D'Antonio et al. 2021)                                                    |
| <i>RAB2A</i>    | Adipose subcutaneous (Hospitalized) - Hazardous<br>Artery aorta (Hospitalized) - Hazardous<br>Artery tibial (Hospitalized) - Hazardous<br>CD4 Memory Stim 40h (Hospitalized) - Hazardous<br>CD4 Naïve Stim 16h (Hospitalized) - Hazardous<br>CD4 Naïve Stim 40h (Hospitalized) - Hazardous<br>Esophagus mucosa (Hospitalized) - Hazardous<br>Esophagus muscularis (Hospitalized) - Hazardous<br>Liver (Hospitalized) - Hazardous<br>Lung (Hospitalized) - Hazardous<br>Skin not sun exposed (Hospitalized) - Hazardous<br>T naïve Stim 40h (Hospitalized) - Hazardous | MR and colocalization for pQTLs, but not for eQTLs (Pietzner et al. 2022)                 |
| <i>RALGDS</i>   | T effect memory Stim 16h (Severe and Susceptible) - Protective                                                                                                                                                                                                                                                                                                                                                                                                                                                                                                        | None                                                                                      |
| <i>RASIP1</i>   | Esophageal Gastroesophageal junction (Severe and Hospitalized) - Protective<br>Esophagus muscularis (Severe) - Protective                                                                                                                                                                                                                                                                                                                                                                                                                                             | None                                                                                      |
| <i>SLC22A31</i> | Heart left ventricle (Severe and Hospitalized) – Hazardous                                                                                                                                                                                                                                                                                                                                                                                                                                                                                                            | PheWAS linked (Covid-19 Host Genetics Initiative 2022)                                    |
| <i>SLC6A20</i>  | Breast mammary tissue (Severe and Hospitalized) – Hazardous                                                                                                                                                                                                                                                                                                                                                                                                                                                                                                           | GWAS (Severe Covid et al. 2020)                                                           |
| <i>WNT3</i>     | Adrenal Gland (Hospitalized) - Hazardous<br>Artery Aorta (Severe and Hospitalized) - <b>Protective</b><br>Colon Transverse (Severe) - Hazardous<br>Nerve Tibial (Severe) - Hazardous<br>Thyroid (Severe and Hospitalized) - Hazardous                                                                                                                                                                                                                                                                                                                                 | Fine mapped (Wu et al. 2021)                                                              |

## References

- Baranova A, Cao H, Chen J, Zhang F (2022) Causal Association and Shared Genetics Between Asthma and COVID-19. *Front Immunol* 13: 705379. doi: 10.3389/fimmu.2022.705379
- Baranova A, Cao H, Zhang F (2021) Unraveling Risk Genes of COVID-19 by Multi-Omics Integrative Analyses. *Front Med (Lausanne)* 8: 738687. doi: 10.3389/fmed.2021.738687
- Covid-19 Host Genetics Initiative (2022) A first update on mapping the human genetic architecture of COVID-19. *Nature* 608: E1-E10. doi: 10.1038/s41586-022-04826-7

- D'Antonio M, Nguyen JP, Arthur TD, Matsui H, Initiative C-HG, D'Antonio-Chronowska A, Frazer KA (2021) SARS-CoV-2 susceptibility and COVID-19 disease severity are associated with genetic variants affecting gene expression in a variety of tissues. *Cell Rep* 37: 110020. doi: 10.1016/j.celrep.2021.110020
- Degenhardt F, Ellinghaus D, Juzenas S, Lerga-Jaso J, Wendorff M, Maya-Miles D, Uellendahl-Werth F, ElAbd H, Ruhlemann MC, Arora J, Ozer O, Lenning OB, Myhre R, Vadla MS, Wacker EM, Wienbrandt L, Blandino Ortiz A, de Salazar A, Garrido Chercoles A, Palom A, Ruiz A, Garcia-Fernandez AE, Blanco-Grau A, Mantovani A, Zanella A, Holten AR, Mayer A, Bandera A, Cherubini A, Protti A, Aghemo A, Gerussi A, Ramirez A, Braun A, Nebel A, Barreira A, Lleo A, Teles A, Kildal AB, Biondi A, Caballero-Garralda A, Ganna A, Gori A, Gluck A, Lind A, Tanck A, Hinney A, Carreras Nolla A, Fracanzani AL, Peschuck A, Cavallero A, Dyrhol-Riise AM, Ruello A, Julia A, Muscatello A, Pesenti A, Voza A, Rando-Segura A, Solier A, Schmidt A, Cortes B, Mateos B, Nafria-Jimenez B, Schaefer B, Jensen B, Bellinghausen C, Maj C, Ferrando C, de la Horra C, Quereda C, Skurk C, Thibeault C, Scollo C, Herr C, Spinner CD, Gassner C, Lange C, Hu C, Paccapelo C, Lehmann C, Angelini C, Cappadona C, Azuure C, Covicat study group AS, Bianco C, Cea C, Sancho C, Hoff DAL, Galimberti D, Prati D, Haschka D, Jimenez D, Pestana D, Toapanta D, Muniz-Diaz E, Azzolini E, Sandoval E, Binatti E, Scarpini E, Helbig ET, et al. (2022) Detailed stratified GWAS analysis for severe COVID-19 in four European populations. *Hum Mol Genet* 31: 3945-3966. doi: 10.1093/hmg/ddac158
- Fricke-Galindo I, Martinez-Morales A, Chavez-Galan L, Ocana-Guzman R, Buendia-Roldan I, Perez-Rubio G, Hernandez-Zenteno RJ, Veronica-Aguilar A, Alarcon-Dionet A, Aguilar-Duran H, Gutierrez-Perez IA, Zaragoza-Garcia O, Alanis-Ponce J, Camarena A, Bautista-Becerril B, Nava-Quiroz KJ, Mejia M, Guzman-Guzman IP, Falfan-Valencia R (2022) IFNAR2 relevance in the clinical outcome of individuals with severe COVID-19. *Front Immunol* 13: 949413. doi: 10.3389/fimmu.2022.949413
- Gaziano L, Giambartolomei C, Pereira AC, Gaulton A, Posner DC, Swanson SA, Ho YL, Iyengar SK, Kosik NM, Vujkovic M, Gagnon DR, Bento AP, Barrio-Hernandez I, Ronnblom L, Hagberg N, Lundtoft C, Langenberg C, Pietzner M, Valentine D, Gustincich S, Tartaglia GG, Allara E, Surendran P, Burgess S, Zhao JH, Peters JE, Prins BP, Angelantonio ED, Devineni P, Shi Y, Lynch KE, DuVall SL, Garcon H, Thomann LO, Zhou JJ, Gorman BR, Huffman JE, O'Donnell CJ, Tsao PS, Beckham JC, Pyarajan S, Muralidhar S, Huang GD, Ramoni R, Beltrao P, Danesh J, Hung AM, Chang KM, Sun YV, Joseph J, Leach AR, Edwards TL, Cho K, Gaziano JM, Butterworth AS, Casas JP, Initiative VAMVPC-S (2021) Actionable druggable genome-wide Mendelian randomization identifies repurposing opportunities for COVID-19. *Nat Med* 27: 668-676. doi: 10.1038/s41591-021-01310-z
- Hernandez Cordero AI, Li X, Milne S, Yang CX, Bosse Y, Joubert P, Timens W, van den Berge M, Nickle D, Hao K, Sin DD (2021) Multi-omics highlights ABO plasma protein as a causal risk factor for COVID-19. *Hum Genet* 140: 969-979. doi: 10.1007/s00439-021-02264-5
- Kousathanas A, Pairo-Castineira E, Rawlik K, Stuckey A, Odhams CA, Walker S, Russell CD, Malinauskas T, Wu Y, Millar J, Shen X, Elliott KS, Griffiths F, Oosthuyzen W, Morrice K, Keating S, Wang B, Rhodes D, Klaric L, Zechner M, Parkinson N, Siddiq A, Goddard P, Donovan S, Maslove D, Nichol A, Semple MG, Zainy T, Maleady-Crowe F, Todd L, Salehi S, Knight J, Elgar G, Chan G, Arumugam P, Patch C, Rendon A, Bentley D, Kingsley C, Kosmicki JA, Horowitz JE, Baras A, Abecasis GR, Ferreira MAR, Justice A, Mirshahi T, Oetjens M, Rader DJ, Ritchie MD, Verma A, Fowler TA, Shankar-Hari M, Summers C, Hinds C, Horby P, Ling L, McAuley D, Montgomery H, Openshaw PJM, Elliott P, Walsh T, Tenesa A, Gen OI, and Me i, Initiative C-HG, Fawkes A, Murphy L, Rowan K, Ponting CP, Vitart V, Wilson JF, Yang J, Bretherick AD, Scott RH, Hendry SC, Moutsianas L, Law A, Caulfield MJ, Baillie JK (2022) Whole-genome sequencing reveals host factors underlying critical COVID-19. *Nature* 607: 97-103. doi: 10.1038/s41586-022-04576-6
- Krishnamoorthy S, Li GH, Cheung CL (2023) Transcriptome-wide summary data-based Mendelian randomization analysis reveals 38 novel genes associated with severe COVID-19. *J Med Virol* 95: e28162. doi: 10.1002/jmv.28162
- Li P, Ke Y, Shen W, Shi S, Wang Y, Lin K, Guo X, Wang C, Zhang Y, Zhao Z (2022) Targeted screening of genetic associations with COVID-19 susceptibility and severity. *Front Genet* 13: 1073880. doi: 10.3389/fgene.2022.1073880
- Liu D, Yang J, Feng B, Lu W, Zhao C, Li L (2021) Mendelian randomization analysis identified genes pleiotropically associated with the risk and prognosis of COVID-19. *J Infect* 82: 126-132. doi: 10.1016/j.jinf.2020.11.031
- Nakanishi T, Farjoun Y, Willett J, Allen RJ, Guillen-Guio B, Zhou S, Richards JB (2022) Alternative splicing in the lung influences COVID-19 severity and respiratory diseases. medRxiv. doi: 10.1101/2022.10.18.22281202

- Pairo-Castineira E, Clohisey S, Klaric L, Bretherick AD, Rawlik K, Pasko D, Walker S, Parkinson N, Fourman MH, Russell CD, Furniss J, Richmond A, Gountouna E, Wrobel N, Harrison D, Wang B, Wu Y, Meynert A, Griffiths F, Oosthuyzen W, Kousathanas A, Moutsianas L, Yang Z, Zhai R, Zheng C, Grimes G, Beale R, Millar J, Shih B, Keating S, Zechner M, Haley C, Porteous DJ, Hayward C, Yang J, Knight J, Summers C, Shankar-Hari M, Klenerman P, Turtle L, Ho A, Moore SC, Hinds C, Horby P, Nichol A, Maslove D, Ling L, McAuley D, Montgomery H, Walsh T, Pereira AC, Renieri A, Gen OI, Investigators IC, Initiative C-HG, and Me I, Investigators B, Gen CI, Shen X, Ponting CP, Fawkes A, Tenesa A, Caulfield M, Scott R, Rowan K, Murphy L, Openshaw PJM, Semple MG, Law A, Vitart V, Wilson JF, Baillie JK (2021) Genetic mechanisms of critical illness in COVID-19. *Nature* 591: 92-98. doi: 10.1038/s41586-020-03065-y
- Pairo-Castineira E, Rawlik K, Klaric L, Kousathanas A, Richmond A, Millar J, Russell CD, Malinauskas T, Thwaites R, Stuckey A, Odhams CA, Walker S, Griffiths F, Oosthuyzen W, Morrice K, Keating S, Nichol A, Semple MG, Knight J, Shankar-Hari M, Summers C, Hinds C, Horby P, Ling L, McAuley D, Montgomery H, Openshaw PJM, Walsh T, Tenesa A, Scott RH, Caulfield MJ, Moutsianas L, Ponting CP, Wilson JF, Vitart V, Pereira AC, Luchessi A, Parra E, Cruz-Guerrero R, Carracedo A, Fawkes A, Murphy L, Rowan K, Law A, Hendry SC, Baillie JK (2022) GWAS and meta-analysis identifies multiple new genetic mechanisms underlying severe Covid-19. *medRxiv*. doi: 10.1101/2022.03.07.22271833
- Pietzner M, Chua RL, Wheeler E, Jechow K, Willett JDS, Radbruch H, Trump S, Heidecker B, Zeberg H, Heppner FL, Eils R, Mall MA, Richards JB, Sander LE, Lehmann I, Lukassen S, Wareham NJ, Conrad C, Langenberg C (2022) ELF5 is a potential respiratory epithelial cell-specific risk gene for severe COVID-19. *Nat Commun* 13: 4484. doi: 10.1038/s41467-022-31999-6
- Severe Covid GG, Ellinghaus D, Degenhardt F, Bujanda L, Buti M, Albillos A, Invernizzi P, Fernandez J, Prati D, Baselli G, Asselta R, Grimsrud MM, Milani C, Aziz F, Kassens J, May S, Wendorff M, Wienbrandt L, Uellendahl-Werth F, Zheng T, Yi X, de Pablo R, Chercoles AG, Palom A, Garcia-Fernandez AE, Rodriguez-Frias F, Zanella A, Bandera A, Protti A, Aghemo A, Lleo A, Biondi A, Caballero-Garralda A, Gori A, Tanck A, Carreras Nolla A, Latiano A, Fracanzani AL, Peschuck A, Julia A, Pesenti A, Voza A, Jimenez D, Mateos B, Nafria Jimenez B, Quereda C, Paccapelo C, Gassner C, Angelini C, Cea C, Solier A, Pestana D, Muniz-Diaz E, Sandoval E, Paraboschi EM, Navas E, Garcia Sanchez F, Ceriotti F, Martinelli-Boneschi F, Peyvandi F, Blasi F, Tellez L, Blanco-Grau A, Hemmrich-Stanisak G, Grasselli G, Costantino G, Cardamone G, Foti G, Aneli S, Kurihara H, Elabd H, My I, Galvan-Femenia I, Martin J, Erdmann J, Ferrusquia-Acosta J, Garcia-Etxebarria K, Izquierdo-Sanchez L, Bettini LR, Sumoy L, Terranova L, Moreira L, Santoro L, Scudeller L, Mesonero F, Roade L, Ruhlemann MC, Schaefer M, Carrabba M, Riveiro-Barciela M, Figuera Basso ME, Valsecchi MG, Hernandez-Tejero M, Acosta-Herrera M, D'Angio M, Baldini M, Cazzaniga M, Schulzky M, Cecconi M, Wittig M, et al. (2020) Genomewide Association Study of Severe Covid-19 with Respiratory Failure. *N Engl J Med* 383: 1522-1534. doi: 10.1056/NEJMoa2020283
- Sharif-Zak M, Abbasi-Jorjandi M, Asadikaram G, Ghoreishi ZA, Rezazadeh-Jabalbarzi M, Afsharipur A, Rashidinejad H, Khajepour F, Jafarzadeh A, Arefinia N, Kheyrikhah A, Abolhassani M (2022) CCR2 and DPP9 expression in the peripheral blood of COVID-19 patients: Influences of the disease severity and gender. *Immunobiology* 227: 152184. doi: 10.1016/j.imbio.2022.152184
- Wang Y, Guga S, Wu K, Khaw Z, Tzoumikas K, Tombleson P, Comeau ME, Langefeld CD, Cunninghame Graham DS, Morris DL, Vyse TJ (2022) COVID-19 and systemic lupus erythematosus genetics: A balance between autoimmune disease risk and protection against infection. *PLoS Genet* 18: e1010253. doi: 10.1371/journal.pgen.1010253
- Wu L, Zhu J, Liu D, Sun Y, Wu C (2021) An integrative multiomics analysis identifies putative causal genes for COVID-19 severity. *Genet Med* 23: 2076-2086. doi: 10.1038/s41436-021-01243-5
- Zhou S, Butler-Laporte G, Nakanishi T, Morrison DR, Afilalo J, Afilalo M, Laurent L, Pietzner M, Kerrison N, Zhao K, Brunet-Ratnasingham E, Henry D, Kimchi N, Afrasiabi Z, Rezk N, Bouab M, Petitjean L, Guzman C, Xue X, Tselios C, Vulesevic B, Adeleye O, Abdullah T, Almamlouk N, Chen Y, Chasse M, Durand M, Paterson C, Normark J, Frithiof R, Lipcsey M, Hultstrom M, Greenwood CMT, Zeberg H, Langenberg C, Thysell E, Pollak M, Mooser V, Forgetta V, Kaufmann DE, Richards JB (2021) A Neanderthal OAS1 isoform protects individuals of European ancestry against COVID-19 susceptibility and severity. *Nat Med* 27: 659-667. doi: 10.1038/s41591-021-01281-1
